# Supplementary material for: Proposed Implementation of a Patient-Centered Self-Assessment Tool for Patients with Neuroendocrine Tumors among Academic and Community Practice Sites: The City of Hope Model
Source: MDPI journal article supplement (doi:10.3390/jcm12031229), 2023-02-03

## General Information

Today's date

Patient name

*last, first*

Gender

Female

1. My neuroendocrine tumor (NET) was found:  
*check all that apply*

Date of birth

*mm/dd/yy*

Year of diagnosis

*mm/dd/yy*

Male

Incidentally (routine exam, unrelated procedure)

Due to obstruction

Phone number

Email

NET symptoms/carcinoid syndrome

*Other*

## Part 1 | Diagnosis

2. I am a neuroendocrine tumor (NET) patient and my primary (origin) tumor is:

Thymus

Small intestine  
(ileum)

Rectum

Stomach

Proximal colon

Lung

Appendix

Pheo/para

Pancreas

Distal colon

Unknown

*Other*3. My NET has spread (metastasized) to (*check all that apply*):

Not metastatic at this time

LOCATION

AT DIAGNOSIS

PROGRESSION/NEW IMAGING

DATE *mm/dd/yy*

Liver

Bones

Mesentery

Peritoneum

*Other*

## Part 2 | Pathology - Function - Symptoms

4. My Ki-67 index is % found on Pathology Report dated .

Changed from previous biopsy?

I brought my Pathology Report

Yes

No

N/A

5. My neuroendocrine tumor is (*select an answer in each row*):

ROW 1

Well-differentiated

Poorly differentiated

Don't know

ROW 2

Grade 1

Mitotic index &lt;2, Ki-67 0-2

Grade 2

Mitotic index 2-10, Ki-67 3-20

Grade 3

Mitotic index &gt;10, Ki-67 &gt;20

Don't know

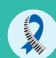

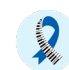

## Part 2 | Pathology - Function - Symptoms - cont'd

6. My neuroendocrine tumor is (*indicate most current*):

Functional (hormone-producing)

Non-functional

Don't know

7. I have symptoms (*check all that apply*):

Diarrhea

Weight loss

Fatigue

Abdominal  
cramping

Palpitations/fast  
heartbeat

Wheezing

Flushing

Pain

Shortness of  
breath

Hypertension/high  
blood pressure

Bloating/gas

*Other*

8. I have had symptoms for \_\_\_\_\_ years (*if applicable*).

## Part 3 | Imaging & Diagnostics

9. I have had the following types of imaging, and possess the disk and/or report (*if applicable*):

| TYPE OF IMAGING                                   | DATE(S) / DATE RANGE | DISK | REPORT |
|---------------------------------------------------|----------------------|------|--------|
| MRI (3 most recent)                               | —                    |      |        |
| CT (3 most recent)                                | —                    |      |        |
| Octreotide scan                                   | —                    |      |        |
| DOTATATE PET<br>(i.e. Ga68 PET/CT or Cu64 PET/CT) | —                    |      |        |
| FDG-PET                                           | —                    |      |        |
| PET                                               | —                    |      |        |
| Echocardiogram                                    | —                    |      |        |
| Colonoscopy                                       | —                    |      |        |
| Upper Endoscopy                                   | —                    |      |        |
| MIBG                                              | —                    |      |        |
| Capsule Endoscopy                                 | —                    |      |        |
| <i>Other</i>                                      | —                    |      |        |
| <i>Other</i>                                      | —                    |      |        |

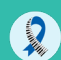

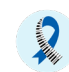

## Part 4 | Labs

10. I have had the following labs and possess the report (*if applicable*). Indicate if abnormal.

| TYPE OF LAB                                                      | DATE(S) / DATE RANGE | REPORT |
|------------------------------------------------------------------|----------------------|--------|
| Complete Blood Count (CBC)                                       | —                    |        |
| Basic Metabolic Panel (BMP)<br>or Complete Metabolic Panel (CMP) | —                    |        |
| Chromogranin A (CgA)                                             | —                    |        |
| Serotonin                                                        | —                    |        |
| 5-HIAA      urine      plasma                                    | —                    |        |
| Plasma (blood) Metanephrine and/or<br>24-Hour Urine              | —                    |        |
| Pancreastatin                                                    | —                    |        |
| Neurokinin A                                                     | —                    |        |
| A1C                                                              | —                    |        |
| Other                                                            | —                    |        |
| Other                                                            | —                    |        |
| Other                                                            | —                    |        |

## Part 5 | Surgery &amp; Treatments

| TYPE                                                                         | DATE(S) | LOCATION | PHYSICIAN | REPORT |
|------------------------------------------------------------------------------|---------|----------|-----------|--------|
| 11. Surgery to remove primary tumor(s) ( <i>Indicate all that apply</i> )    |         |          |           |        |
| Small bowel                                                                  |         |          |           |        |
| Pancreas                                                                     |         |          |           |        |
| Lung                                                                         |         |          |           |        |
| Adrenal                                                                      |         |          |           |        |
| Other                                                                        |         |          |           |        |
| 12. Surgery to remove metastatic tumor(s) ( <i>Indicate all that apply</i> ) |         |          |           |        |
| Liver                                                                        |         |          |           |        |
| Spleen                                                                       |         |          |           |        |
| Lung                                                                         |         |          |           |        |
| Other                                                                        |         |          |           |        |

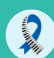



| TYPE | DATE(S) | LOCATION | PHYSICIAN | REPORT |
|------|---------|----------|-----------|--------|
|------|---------|----------|-----------|--------|

## 13. Other surgery

|                                       |  |  |  |  |
|---------------------------------------|--|--|--|--|
| Gallbladder removal (Cholecystectomy) |  |  |  |  |
| Other                                 |  |  |  |  |
| Other                                 |  |  |  |  |

## 14. Liver-directed treatment (indicate all that apply)

|                                                       |  |  |  |  |
|-------------------------------------------------------|--|--|--|--|
| Radiofrequency ablation                               |  |  |  |  |
| Chemoembolization (TACE)                              |  |  |  |  |
| Bland embolization                                    |  |  |  |  |
| Radioembolization (Thera-Sphere®, SIR-Spheres®, TARE) |  |  |  |  |
| Other                                                 |  |  |  |  |

## 15. Somatostatin Analogs (SSA) & others (indicate all that apply)

| TYPE                                      | DOSE | FREQUENCY | START DATE | LAST DOSE (DATE) |
|-------------------------------------------|------|-----------|------------|------------------|
| Sandostatin LAR (octreotide, long-acting) |      |           |            |                  |
| Sandostatin (octreotide, short-acting)    |      |           |            |                  |
| Somatuline Depot (lanreotide)             |      |           |            |                  |
| Xermelo (telotristat etiprate)            |      |           |            |                  |

## 16. Chemotherapy / Biologically-Targeted / Immunotherapy, including Clinical Trials/ PRRT (Peptide Receptor Radionuclide Therapy, i.e. Lutathera®) (indicate all that apply)

| TYPE                                 | DOSE/FREQUENCY | START DATE | END DATE | PHYSICIAN |
|--------------------------------------|----------------|------------|----------|-----------|
| Xeloda (capecitabine)                |                |            | —        |           |
| Temodar (temozolomide)               |                |            | —        |           |
| CAPTEM (capecitabine & temozolomide) |                |            | —        |           |
| Afinitor (everolimus)                |                |            | —        |           |
| Sutent (sunitinib)                   |                |            | —        |           |
| Cisplatin/etoposide                  |                |            | —        |           |
| PRRT                                 |                |            | —        |           |
| Other                                |                |            | —        |           |
| Other                                |                |            | —        |           |

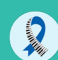

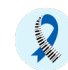

## Part 6 | Additional information

### 17. I am diabetic:

Type I

Pre-diabetic

Type II

I am not diabetic

Notes on diabetes (including diet-controlled, taking meds, taking insulin, physician managing diabetes):

### 18. Allergies (*medications/food*):

### 19. Family history (*specify cancer and/or rare diseases*):

### 20. I have had Genetic Testing:

Yes

No

Don't know

Mutation(s) found

### 21. Medications/supplements (*including vitamins, digestive enzymes*):

### 22. Current physician(s) & medical team (*Including names, institution, phone numbers*)

Primary care provider:

Other providers (*i.e. endocrinologist, cardiologist, navigator*):

Medical oncologist:

Surgeon:

Nuclear medicine physician:

### 23. Social support

Number in household:

Employment Status:

Full-time

Part-time

Retired

On disability

Has employment been affected by diagnosis?





## Notes to ask my physician:

---

---

---

---

---

---

## Resources (available at [www.LACNETS.org/resources](http://www.LACNETS.org/resources))

More resources at [www.LACNETS.org/resources](http://www.LACNETS.org/resources)

LACNETS - Learn Advocate Connect Neuroendocrine Tumor Society | [www.LACNETS.org](http://www.LACNETS.org)

Canadian NET patient resource guide, definitions, reference guide | [bit.ly/CNETS\\_Resource](http://bit.ly/CNETS_Resource)

Cancer Legal Resources Center: legal, disability, insurance, financial | [www.cancerlegalresources.org](http://www.cancerlegalresources.org)

Carcinoid Cancer Foundation - Checklist for the newly diagnosed | [www.carcinoid.org](http://www.carcinoid.org)

Healing NET Foundation (see NET PRIMER PDF) | [www.thehealingnet.org](http://www.thehealingnet.org)

International Neuroendocrine Cancer Alliance | <http://incalliance.org>

NET glossary | [www.knowyournets.com/materials](http://www.knowyournets.com/materials)

Neuroendocrine Tumor Research Foundation | [www.netrf.org](http://www.netrf.org)

North American Neuroendocrine Tumor Society | <https://nanets.net/resources/patient-resources>

Northern California CarciNET Community | [www.NorCalCarciNET.org](http://www.NorCalCarciNET.org)

PRRT Info (by patient advocates Josh Mailman & Gary Murfin) | [www.PRRTinfo.org](http://www.PRRTinfo.org)

Triage Cancer - Resource for legal, insurance, financial | [www.triagecancer.org](http://www.triagecancer.org)



Supplement: s1 [file s1]
